# Supplementary material for: Inducible Slc4a11 Knockout Triggers Corneal Edema Through Perturbation of Corneal Endothelial Pump
Source: PubMed Central journal article supplement (PMC8826551; doi:10.1167/iovs.62.7.28), 2021-06-30

# $\alpha$ -Tubulin. Band 52-56 kDa was analysed

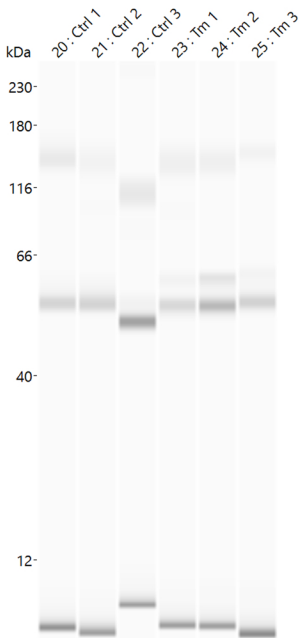

# MCT1

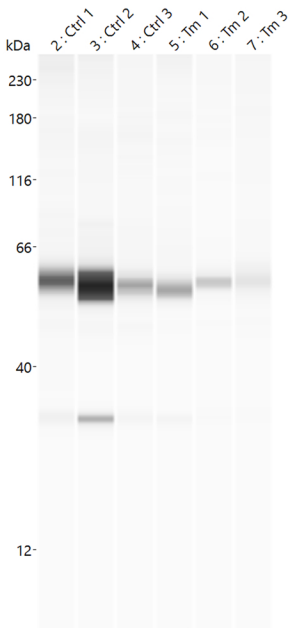

# MCT2. Lower MW band was analyzed

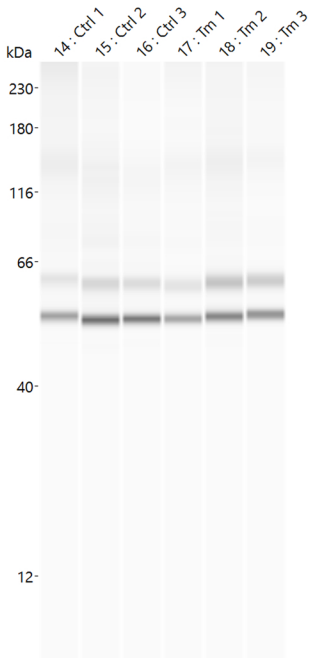

# MCT4

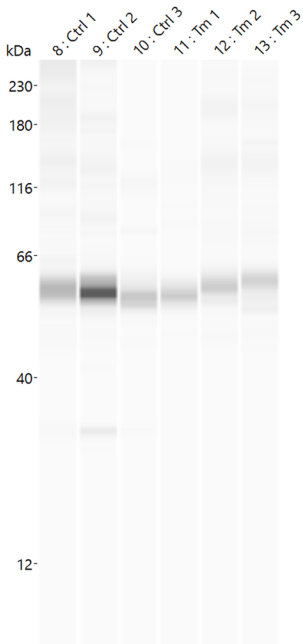

Supplement: iovs-62-7-28_s001.pdf [file iovs-62-7-28_s001.pdf]
